# Supplementary material for: Silica-supported tantalum clusters: catalyst for alkane conversion
Source: Royal Society of Chemistry journal article supplement (doi:10.1039/b608794a), 2006-01-01
Supplement: b608794a.pdf [file b608794a.pdf]

Supplementary Material (ESI) for Chemical Communications  
This journal is © The Royal Society of Chemistry 2006

## **Supplementary Information**

### **Silica-Supported Tantalum Clusters: Catalyst for Alkane Conversion**

Sailendra Nemana<sup>a</sup> and Bruce C. Gates\*<sup>a</sup>

<sup>a</sup> *Department of Chemical Engineering and Materials Science, University of California, Davis, California 95616, USA. Fax: (530) 752 1031; Tel: (530) 752 3953; E-mail: [bcgates@ucdavis.edu](mailto:bcgates@ucdavis.edu)*

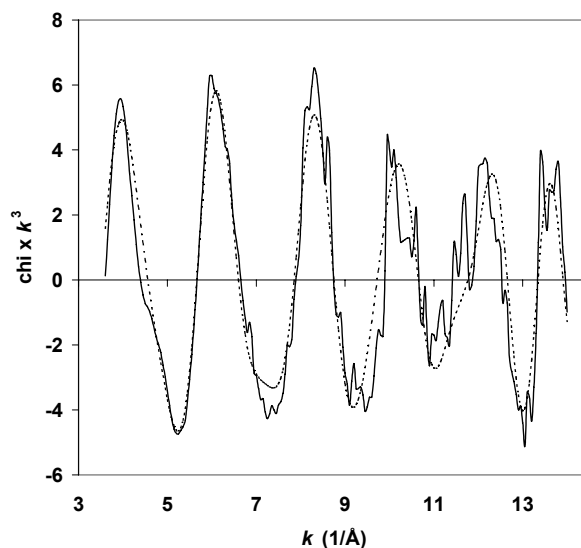

**Supplementary Fig. 1.** EXAFS  $k^3$ -weighted spectrum of the sample treated in flowing  $H_2$  at 523 K (solid line) and the fit (dotted line).

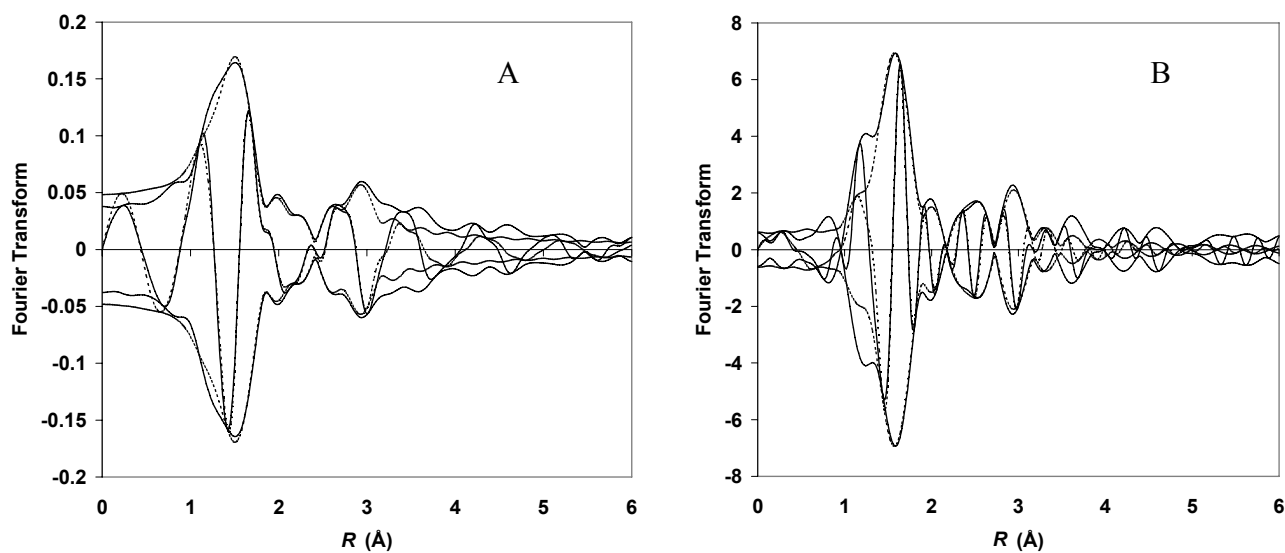

**Supplementary Fig. 2.** Fourier transform of the EXAFS spectrum of the sample treated in flowing  $H_2$  at 523 K (solid line) and the fit (dotted line). Panel A is the  $k^1$ -weighted Fourier Transform; panel B is the  $k^3$ -weighted Fourier transform.

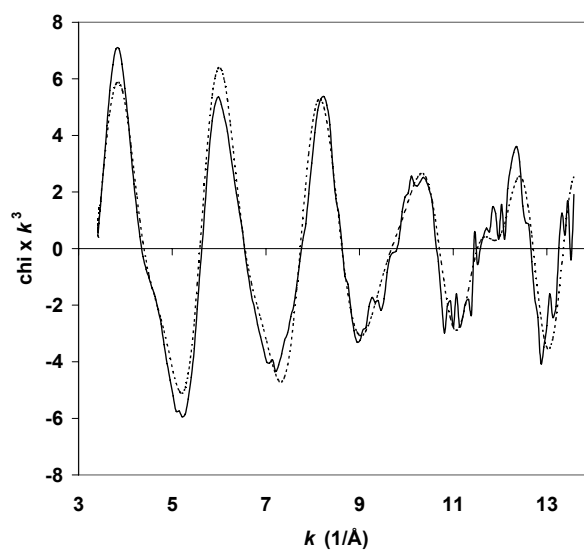

**Supplementary Fig. 3.** EXAFS  $k^3$ -weighted spectrum of the sample treated in ethane at 523 K (solid line) and the fit (dotted line).

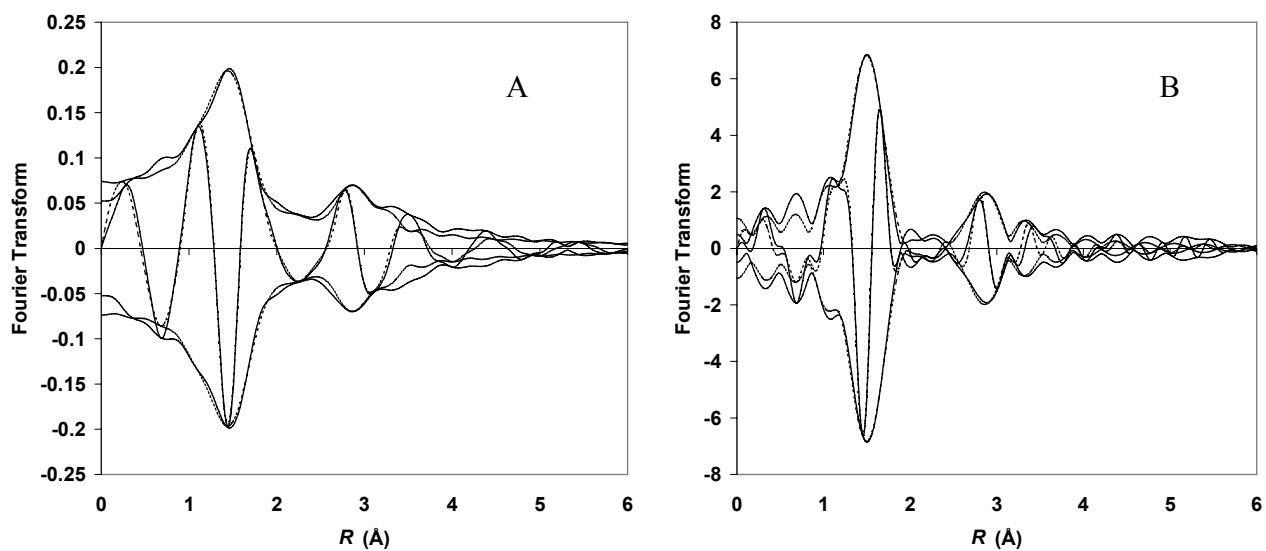

**Supplementary Fig. 4.** Fourier transform of the EXAFS spectrum of the sample treated in ethane at 523 K (solid line) and the fit (dotted line). Panel A is the  $k^1$ -weighted Fourier Transform; panel B is the  $k^3$ -weighted Fourier transform.
